# Supplementary material
Source: publisher figshare collection journal article supplement (https://sage.figshare.com/ndownloader/files/20718273)
Supplement: Supplementary file 1 [file 20718273]

## Standardised Telephone Questionnaire

### Tail movement

1. Has your cat regained any tail movement since diagnosis?

- ☐ No, my cat's tail remains paralysed  
☐ Yes, my cat has a little more tail movement  
☐ Yes, my cat has improved a lot  
☐ Yes, my cat has regained normal tail movements  
☐ Other:
- 

2. Has your cat's mobility been affected by it's tail pull injury or tail amputation?

- ☐ Yes  
☐ No  
☐ Maybe  
☐ Other:
- 

3. Has your cat injured it's tail since being diagnosed with a tail pull injury?

- ☐ Yes  
☐ No  
☐ I don't remember  
☐ Other:
- 

### Urination

4. Is your cat on any medications to aid with bladder control? If so, which ones?

---

---

---

---

---

5. Has your cat's urinary function improved since diagnosis?

- ☐ No
  - ☐ Yes
  - ☐ My cat is now urinating normally
  - ☐ Not applicable
  - ☐ Other:
- 

6. Did your cat have a urinary catheter placed? If so, for how long?

- ☐ No, my cat did not have a urinary catheter
  - ☐ Yes, during hospitalisation only
  - ☐ Yes, for the first 2 weeks
  - ☐ Yes, for 1 month
  - ☐ Yes, for longer than 1 month
  - ☐ I don't remember
  - ☐ Other:
- 

7. Have you had to manually express your cat's bladder yourself?

- ☐ Yes, it works well and my cat tolerates it
- ☐ Yes, but I struggle to express the bladder fully
- ☐ Yes, but my cat no longer tolerates it
- ☐ No, I have never expressed my cat's bladder

8. How long did you have to manually express your cat's bladder?

- ☐ For the first 2 weeks
  - ☐ For 1 month
  - ☐ For 2 months
  - ☐ For longer than 2 months (please specify if possible)
  - ☐ I am still expressing my cat's bladder
  - ☐ Not applicable
  - ☐ Other:
- 

9. Has your cat had any urinary tract infections since being diagnosed with a tail pull injury?

- ☐ No
- ☐ Yes, once
- ☐

- ☐ Yes, twice
- ☐ Yes, more than twice
- ☐ I don't remember

10. Has your cat experienced any burns or skin irritation caused by leaking urine since diagnosis?

- ☐ Yes
- ☐ No
- ☐ I don't remember
- ☐ Other:
- 

## Defaecation

11. Has your cat had any problems with defaecation since being diagnosed with a tail pull injury?

- ☐ Yes, my cat has accidents in the house
- ☐ Yes, but I am able to manage this at home
- ☐ No

12. Has your cat been treated for constipation since diagnosis?

- ☐ Yes
- ☐ No
- ☐ I don't remember
- ☐ Other:
-
